# Supplementary material for: Correction: The Adipocytokine Nampt and Its Product NMN Have No Effect on Beta-Cell Survival but Potentiate Glucose Stimulated Insulin Secretion
Source: PubMed Central journal article supplement (PMC9202939; doi:10.1371/journal.pone.0270243), 2022-06-16
Supplement: pone.0270243.s001.pdf [file pone.0270243.s001.pdf]

### Phospho-p53 blot/Normalisierung beta-Aktin

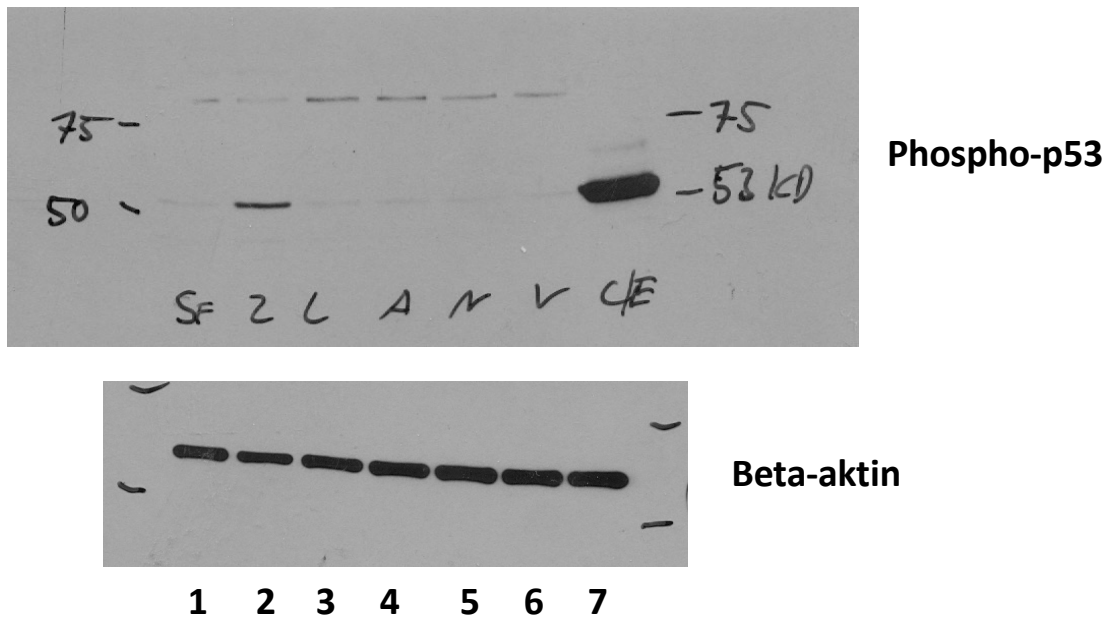

- 1: serum free control
- 2: cytokines (IL1beta/IFNgamma)
- 3: Leptin
- 4: Adiponectin
- 5: Nampt
- 6: other treatment (unrelated to published data)
- 7: Camptothecin/Etoposid (+control)

**Caspase-3/cleaved caspase-3 blot/ GAPDH**

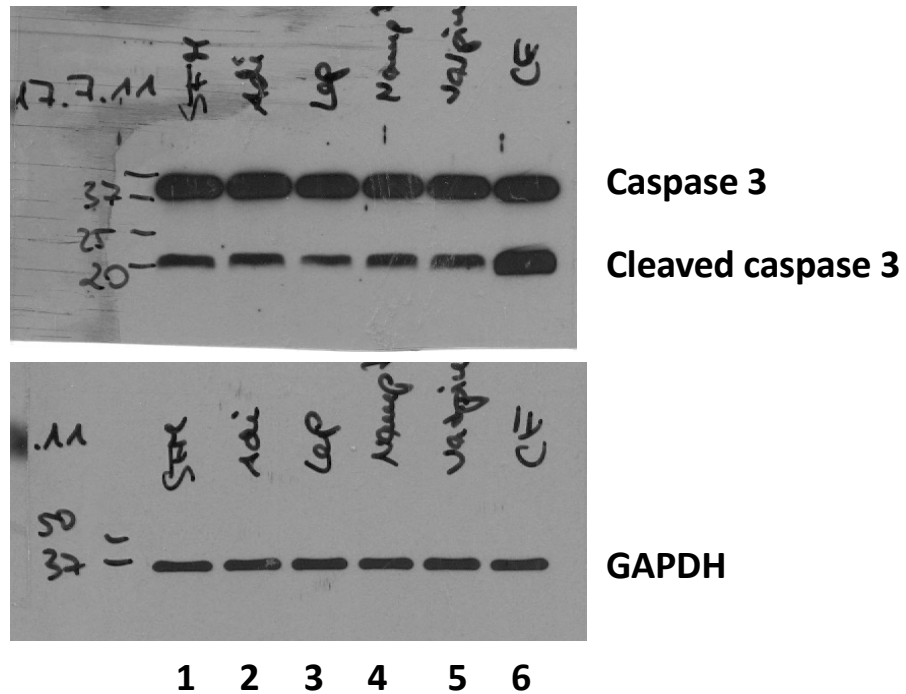

- 1: serum free control
- 2: Adiponectin
- 3: Leptin
- 4: Nampt
- 5: other treatment (unrelated to published data)
- 6: Camptothecin/Etoposid (+control)
